# Supplementary material
Source: PubMed Central journal article supplement (PMC2780807)
Supplement: 0902364106_0902364106SI.pdf [file 0902364106_0902364106SI.pdf]

# Supporting Information

Callahan et al. 10.1073/pnas.0902364106

SI Text

## Parameterizing Dynamics of Collinearity

Dynamics of collinearity distribution described by Eq. 1 involves a conditional probability  $\Gamma(y|y',y'')$  that parents with collinearities  $y',y''$  generate an offspring with  $y$ . This “transition probability” must allow an equilibrium distribution  $\rho(y)$  corresponding to random genomic order. Hence:

$$\rho(y) = \int dy' \int dy'' \rho(y') \rho(y'') \Gamma(y|y',y''). \quad [\text{S1}]$$

For a sufficiently long genome,  $\rho(y)$  is well approximated by a Gaussian:

$$\rho(y) = \frac{e^{-\kappa y^2/2}}{\sqrt{2\pi\kappa^{-1}}}. \quad [\text{S2}]$$

A reasonable phenomenological model for  $\Gamma$  must generate relaxation to a Gaussian equilibrium distribution while retaining some correlation between the offspring and the parents. Both effects can be captured by the following simple but nontrivial form:

$$\Gamma(y|y',y'') = \frac{e^{-\kappa[y-\alpha(y'+y'')]^2/2(1-2\alpha^2)}}{\sqrt{2\pi\kappa^{-1}(1-2\alpha^2)}}, \quad [\text{S3}]$$

which provides a whole family of models with the free parameter  $\alpha < 1/2$  controlling the degree of parent–offspring correlation. For  $\alpha = 0$ , equilibrium is attained in a single step,  $\Gamma(y|y',y'') = \rho(y)$ , which is the case discussed in the main text. Qualitatively

similar results—e.g. existence of the fixed point  $y^*$ —are obtained for any value of  $\alpha$ .

**Collinearity and the Success of Recombinant Offspring.** The contribution of collinearity to the success of recombination in creating high-fitness offspring is quantified in our paper by use of the function  $q(y)$ . As presented, this function depends only on the recombinant’s (“child’s”) collinearity. However, the likelihood of a recombination producing a high-fitness offspring is in fact a more complex mapping which depends in important ways on the parental genotypes. The function  $q(y)$  implicitly is a population average over parental genotypes conditioned on (i) offspring collinearity and (ii) offspring encoding a novel  $L^*$  pathway. To be explicit, we define the probability of a recombinant offspring to have collinearity  $y$  and encode a novel  $L^*$  pathway

$$\chi_*(y) = N^{-2} \sum_{g_1} \sum_{g_2} n(g_1)n(g_2)K_*(y|g_1,g_2), \quad [\text{S4}]$$

where  $n(g)$  is the number of genotypes  $g$  in the population. The probability of a recombinant offspring to have collinearity  $y$  whether or not it encodes an  $L^*$  pathway is

$$\chi(y) = N^{-2} \sum_{g_1} \sum_{g_2} n(g_1)n(g_2)K(y|g_1,g_2) \quad [\text{S5}]$$

$$= \int dy' \int dy'' \xi(y')\xi(y'')\Gamma(y|y',y''). \quad [\text{S6}]$$

We then have  $q(y) = \chi_*(y)/\chi(y)$ .

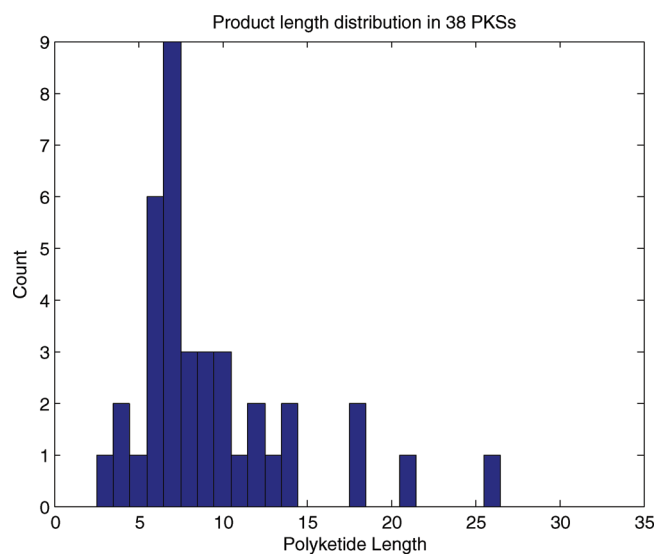

**Fig. S1.** Distribution of lengths of modular PKS pathways in bacteria. A histogram of pathway length for the set of 38 modular PKS pathways exhibits a peak length 7, suggesting a threshold level of complexity. Data from Thattai M, Burak Y, Shraiman B (2007) The origins of specificity in polyketide synthase protein interactions. *PLoS Comput Biol* 3:e186. (Dataset S1 found at doi:10.1371/journal.pcbi.0030186.sd001).
